# Supplementary material for: On the thermal stability and surface and catalytic properties of Ag–Ni nanoparticles
Source: Royal Society of Chemistry journal article supplement (doi:10.1039/d6ra01654e), 2026-04-23
Supplement: d6ra01654e1.pdf [file d6ra01654e1.pdf]

## Supplementary Materials

### Interactive list of figures and tables in supplementary materials:

|                                                                                                                                                                                                                                                                                                                                                                                                                                    |    |
|------------------------------------------------------------------------------------------------------------------------------------------------------------------------------------------------------------------------------------------------------------------------------------------------------------------------------------------------------------------------------------------------------------------------------------|----|
| <b>Fig. S 1:</b> Calculated phase diagram of the Ag-Ni system. M...monotectic invariant reaction, E...eutectic invariant reaction. Ref.: Kroupa, A.; Dinsdale, A.; Watson, A.; Vřešťál, J.; Vizdal, J.; Zemanova, A. The Development of the COST 531 Lead-Free Solders Thermodynamic Database. <i>JOM</i> 2007, 59, 20–25. <a href="https://doi.org/10.1007/s11837-007-0084-6">https://doi.org/10.1007/s11837-007-0084-6</a> ..... | 2  |
| <b>Fig. S 2:</b> STEM image of Ag NPs. ....                                                                                                                                                                                                                                                                                                                                                                                        | 2  |
| <b>Fig. S 3:</b> Mass spectrum of Ag <sub>34.5</sub> Ni <sub>65.5</sub> nanoparticles in the m/z range 38–46 (top: sample spectrum; bottom: background). The peak at m/z = 40 corresponds to residual argon, while the peak at m/z = 44 indicates CO <sub>2</sub> evolution. ....                                                                                                                                                  | 3  |
| <b>Fig. S 4:</b> EDS analysis of the Ag <sub>62</sub> Ni <sub>38</sub> sample showing the distribution of both elements .....                                                                                                                                                                                                                                                                                                      | 4  |
| <b>Fig. S 5:</b> EDS analysis of the Ag <sub>62</sub> Ni <sub>38</sub> sample showing the spatial distribution of silver. ....                                                                                                                                                                                                                                                                                                     | 4  |
| <b>Fig. S 6:</b> EDS analysis of the Ag <sub>62</sub> Ni <sub>38</sub> sample showing the spatial distribution of nickel. ....                                                                                                                                                                                                                                                                                                     | 5  |
| <b>Fig. S 7:</b> SEM image of sample Ag <sub>51</sub> Ni <sub>49</sub> after the DSC analysis (top - ETD detector, bottom - CBS detector). ....                                                                                                                                                                                                                                                                                    | 6  |
| <b>Fig. S 8:</b> EDS analysis of the Ag <sub>9</sub> Ni <sub>91</sub> sample showing the distribution of both elements. ....                                                                                                                                                                                                                                                                                                       | 7  |
| <b>Fig. S 9:</b> EDS analysis of the Ag <sub>86</sub> Ni <sub>14</sub> sample showing the spatial distribution of nickel .....                                                                                                                                                                                                                                                                                                     | 7  |
| <b>Fig. S 10:</b> EDS analysis of the Ag <sub>86</sub> Ni <sub>14</sub> sample showing the spatial distribution of silver. ....                                                                                                                                                                                                                                                                                                    | 8  |
| <b>Table S 1:</b> Sample weight before and after the KEMS analysis. ....                                                                                                                                                                                                                                                                                                                                                           | 9  |
| <b>Table S 2:</b> The results obtained by means of XPS analysis on sample Ag <sub>94</sub> Ni <sub>6</sub> . ....                                                                                                                                                                                                                                                                                                                  | 10 |
| <b>Table S 3:</b> Sample weight before and after the DSC analysis.....                                                                                                                                                                                                                                                                                                                                                             | 10 |

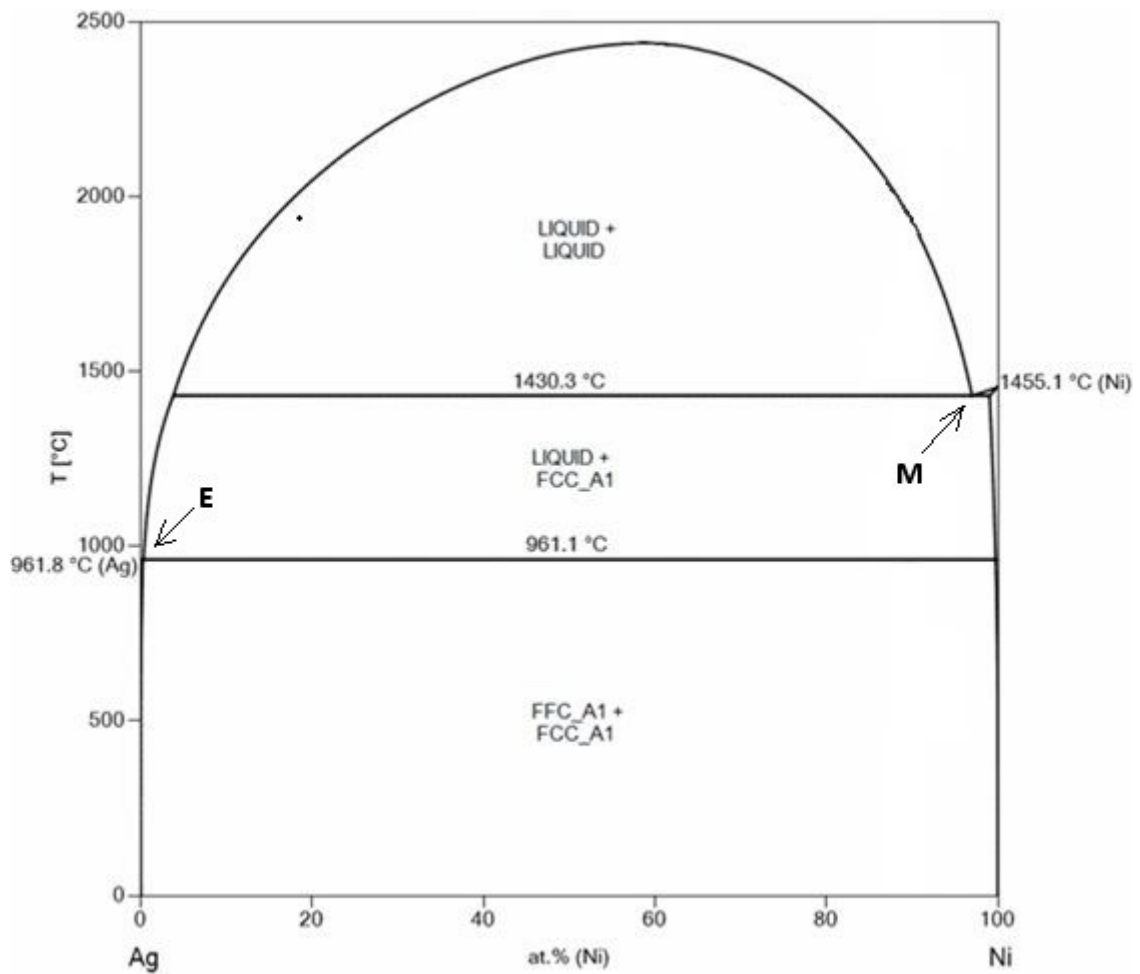

**Fig. S 1:** Calculated phase diagram of the Ag-Ni system. M...monotectic invariant reaction, E...eutectic invariant reaction. Ref.: Kroupa, A.; Dinsdale, A.; Watson, A.; Vřešťál, J.; Vizdal, J.; Zemanova, A. The Development of the COST 531 Lead-Free Solders Thermodynamic Database. *JOM* 2007, 59, 20–25. <https://doi.org/10.1007/s11837-007-0084-6>.

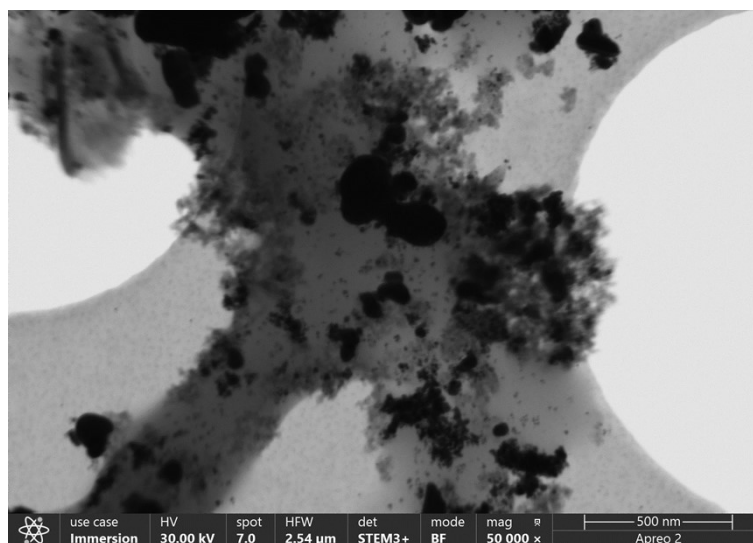

**Fig. S 2:** STEM image of Ag NPs.

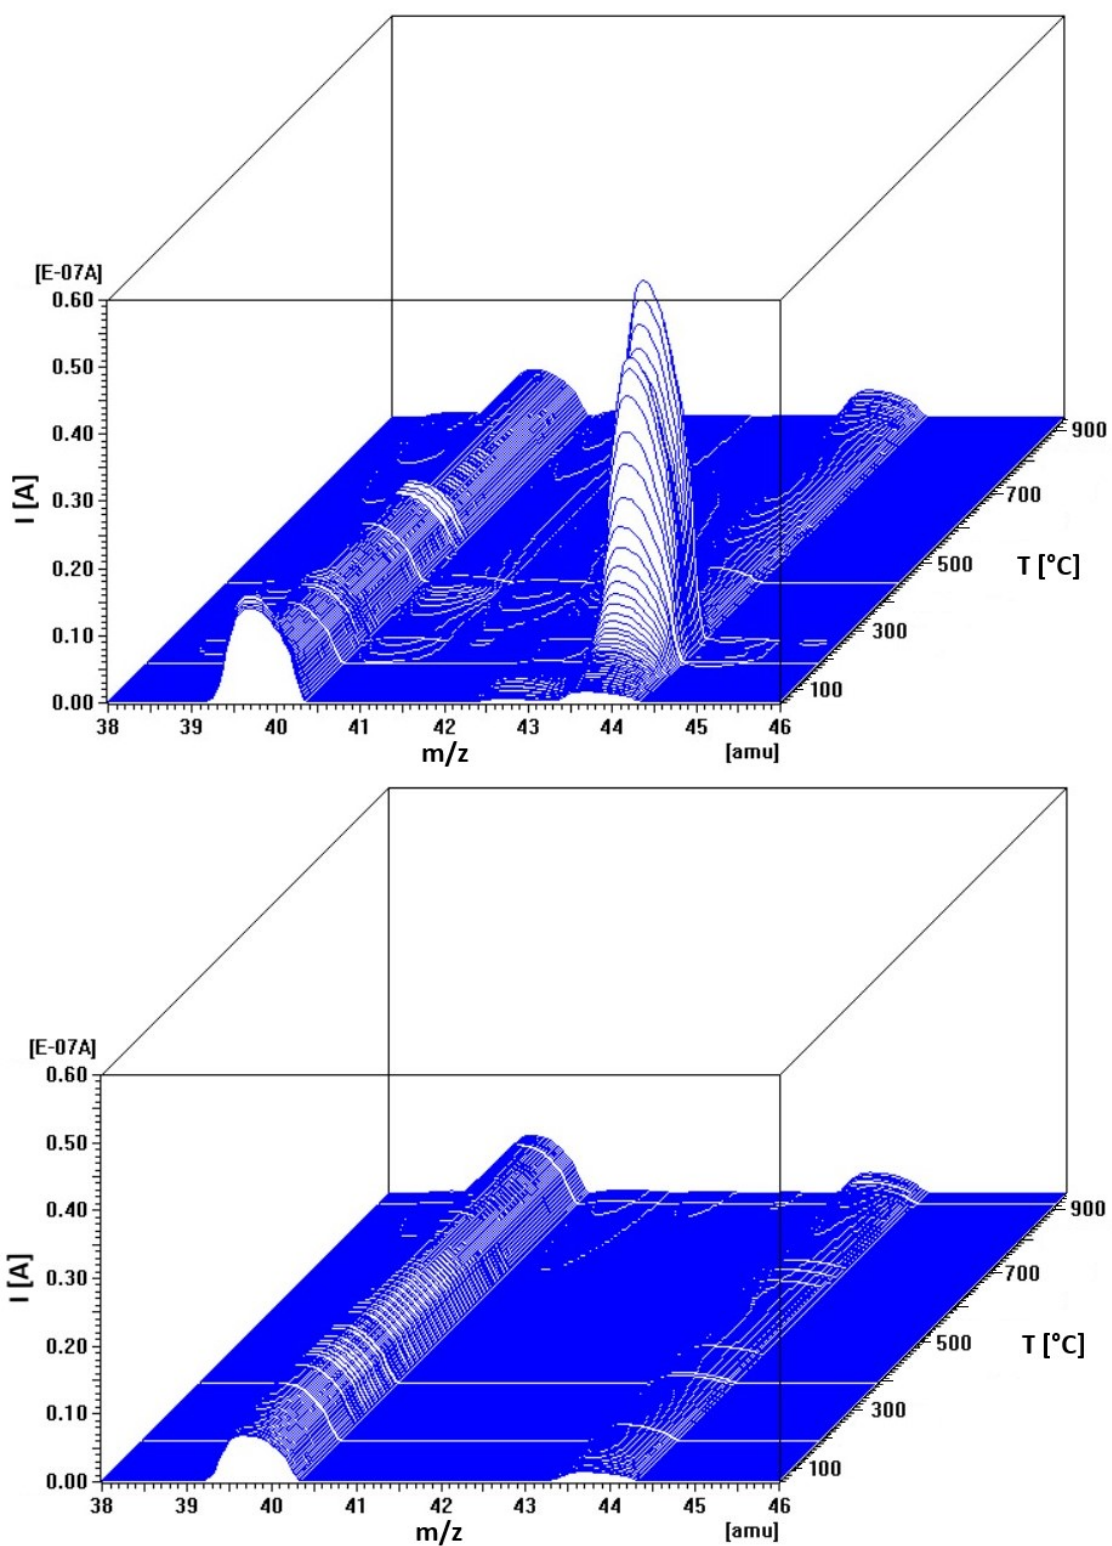

**Fig. S 3:** Mass spectrum of  $\text{Ag}_{34.5}\text{Ni}_{65.5}$  nanoparticles in the  $m/z$  range 38–46 (top: sample spectrum; bottom: background). The peak at  $m/z = 40$  corresponds to residual argon, while the peak at  $m/z = 44$  indicates  $\text{CO}_2$  evolution.

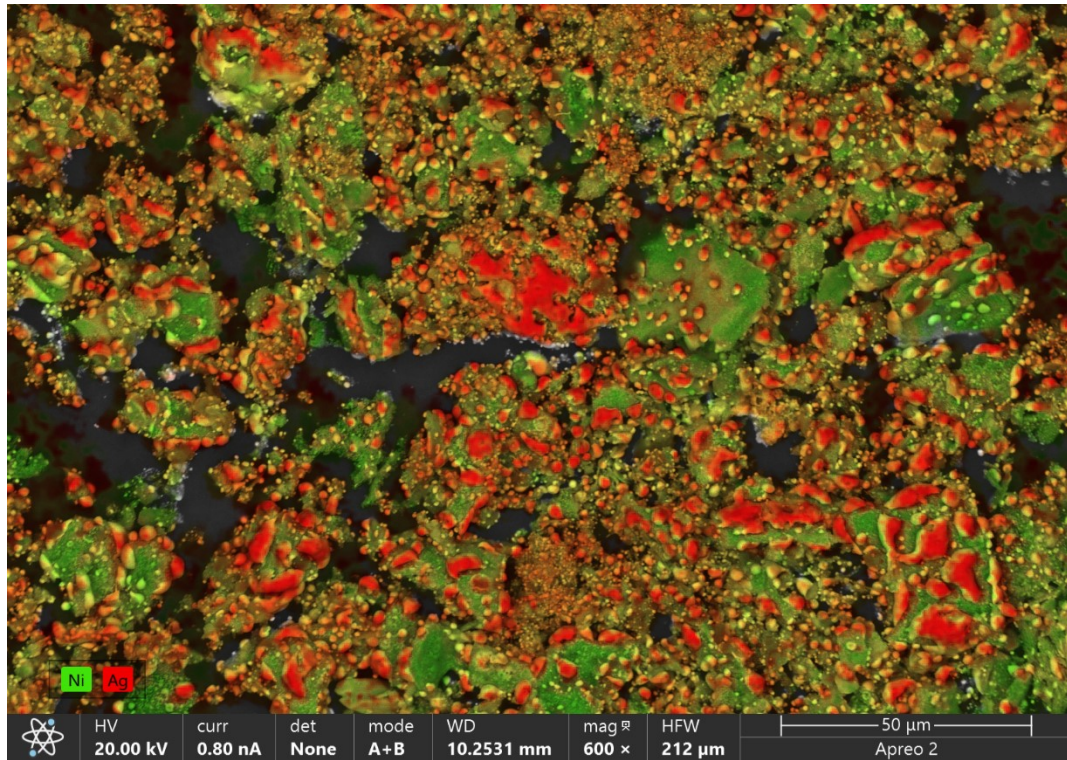

**Fig. S 4:** EDS analysis of the  $\text{Ag}_{62}\text{Ni}_{38}$  sample showing the distribution of both elements

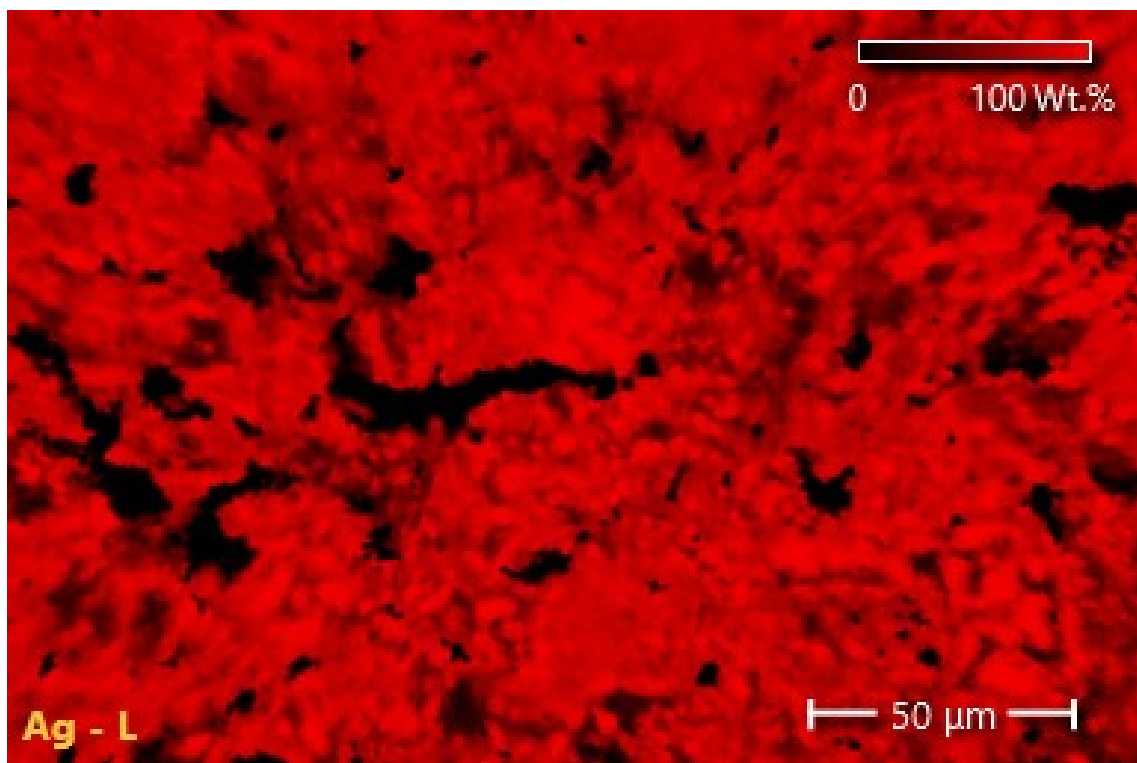

**Fig. S 5:** EDS analysis of the  $\text{Ag}_{62}\text{Ni}_{38}$  sample showing the spatial distribution of silver.

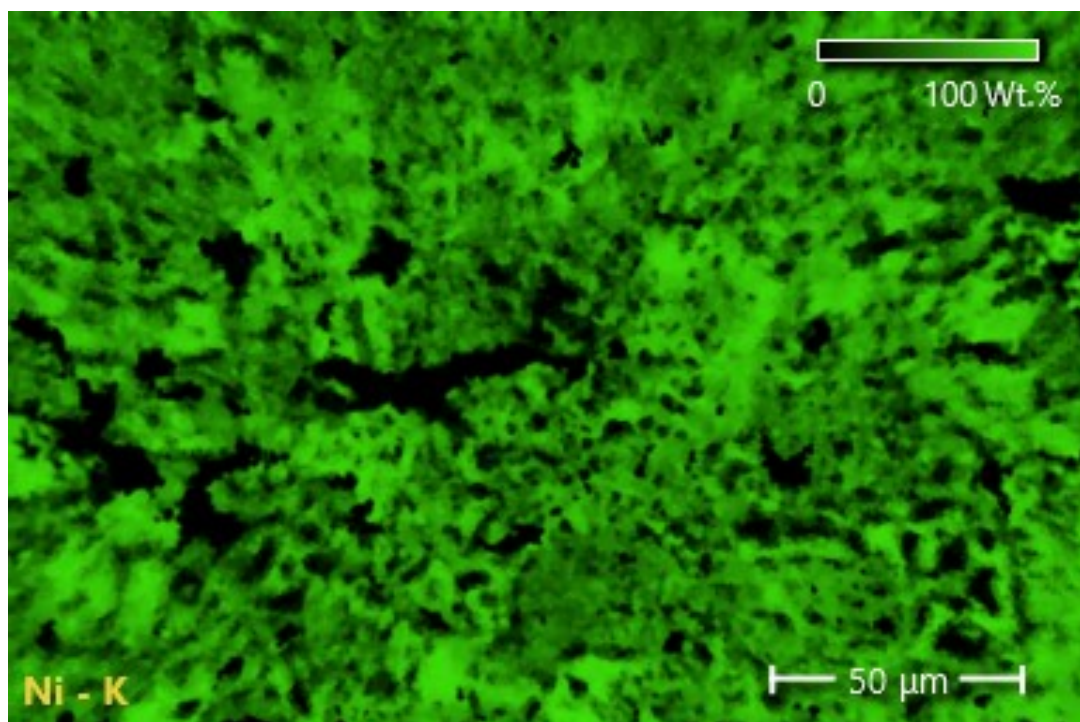

**Fig. S 6:** EDS analysis of the  $\text{Ag}_{62}\text{Ni}_{38}$  sample showing the spatial distribution of nickel.

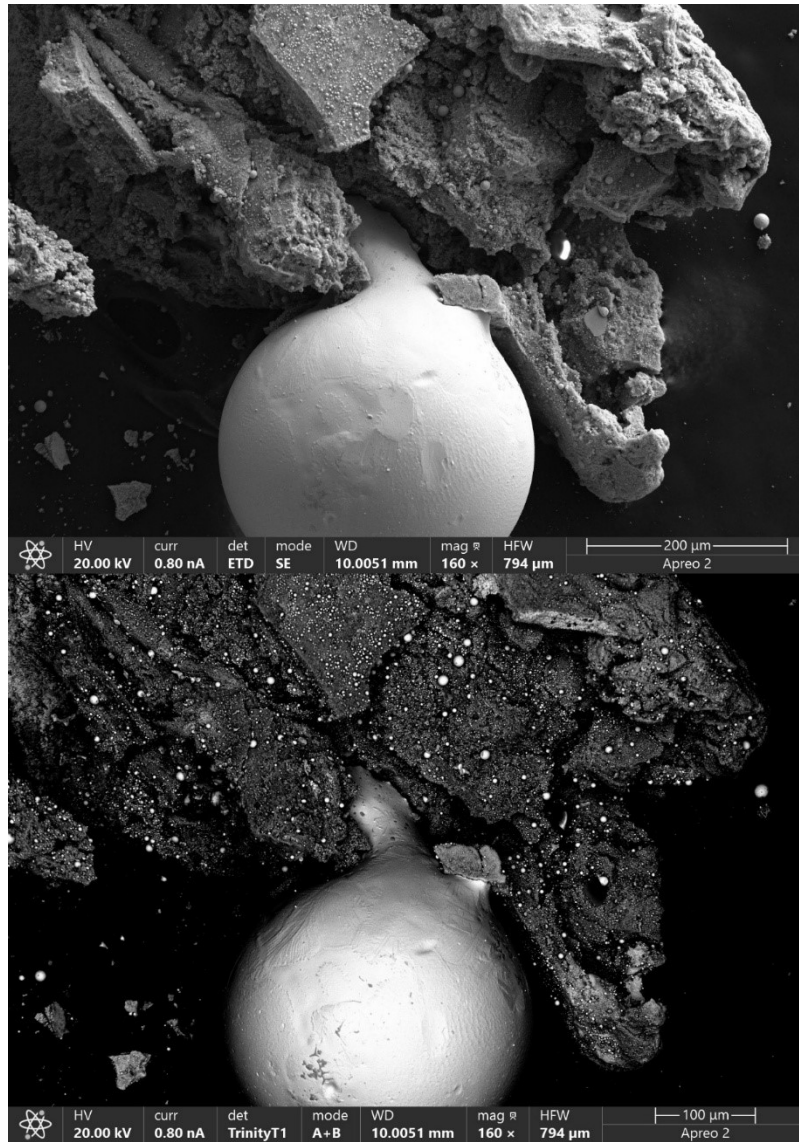

**Fig. S 7:** SEM image of sample  $\text{Ag}_{51}\text{Ni}_{49}$  after the DSC analysis (top - ETD detector, bottom - CBS detector).

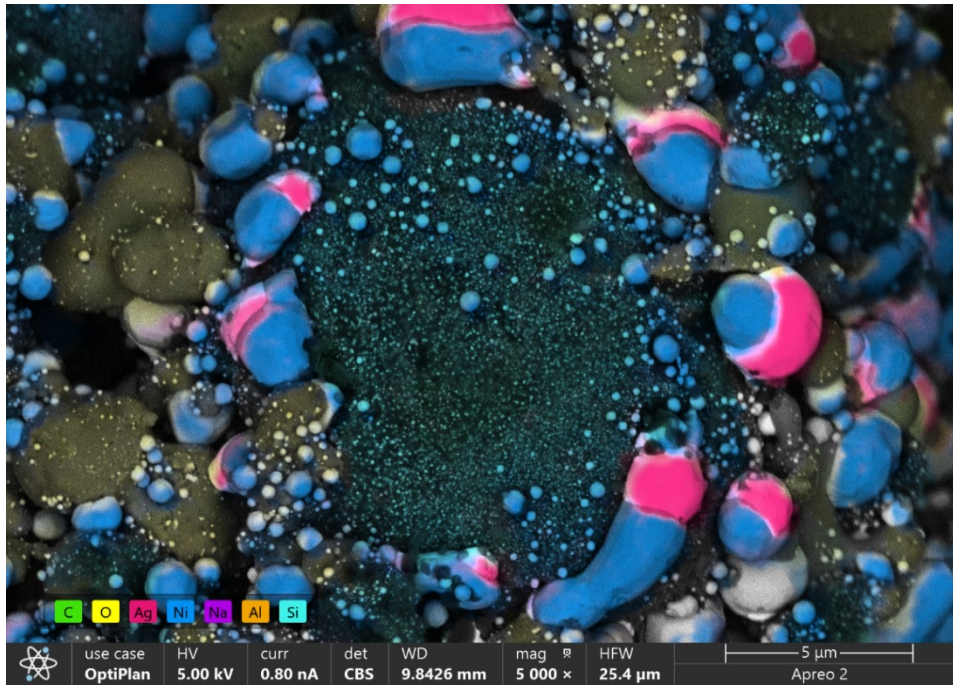

**Fig. S 8:** EDS analysis of the  $\text{Ag}_9\text{Ni}_{91}$  sample showing the distribution of both elements.

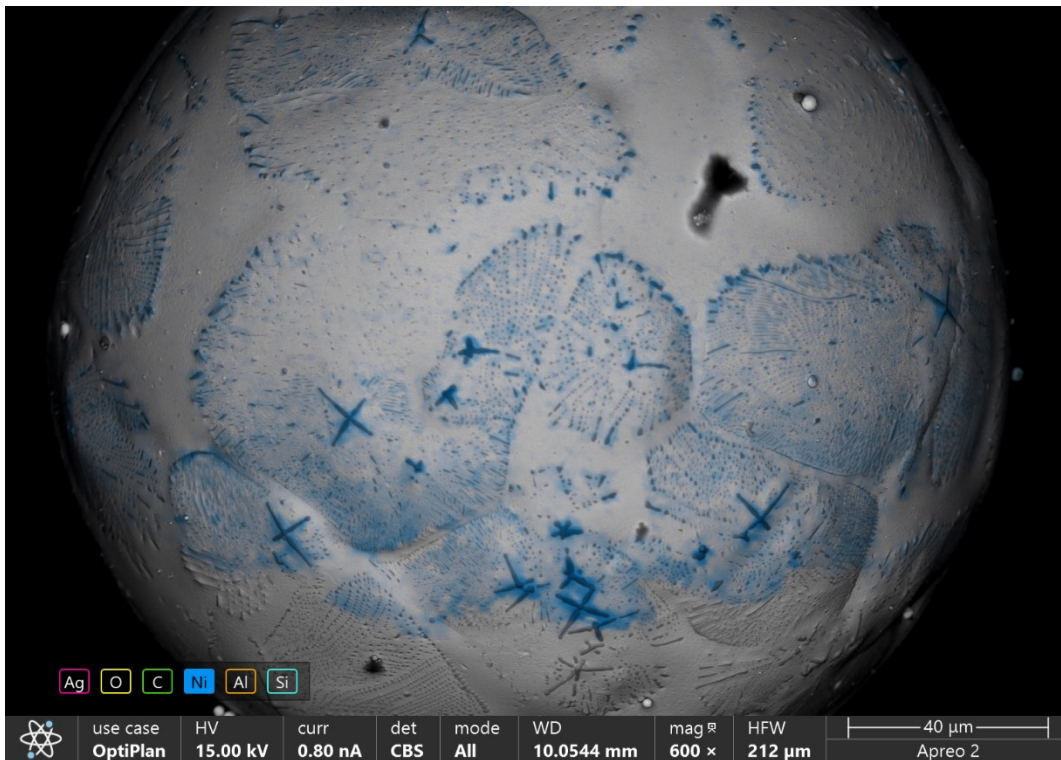

**Fig. S 9:** EDS analysis of the  $\text{Ag}_{86}\text{Ni}_{14}$  sample showing the spatial distribution of nickel

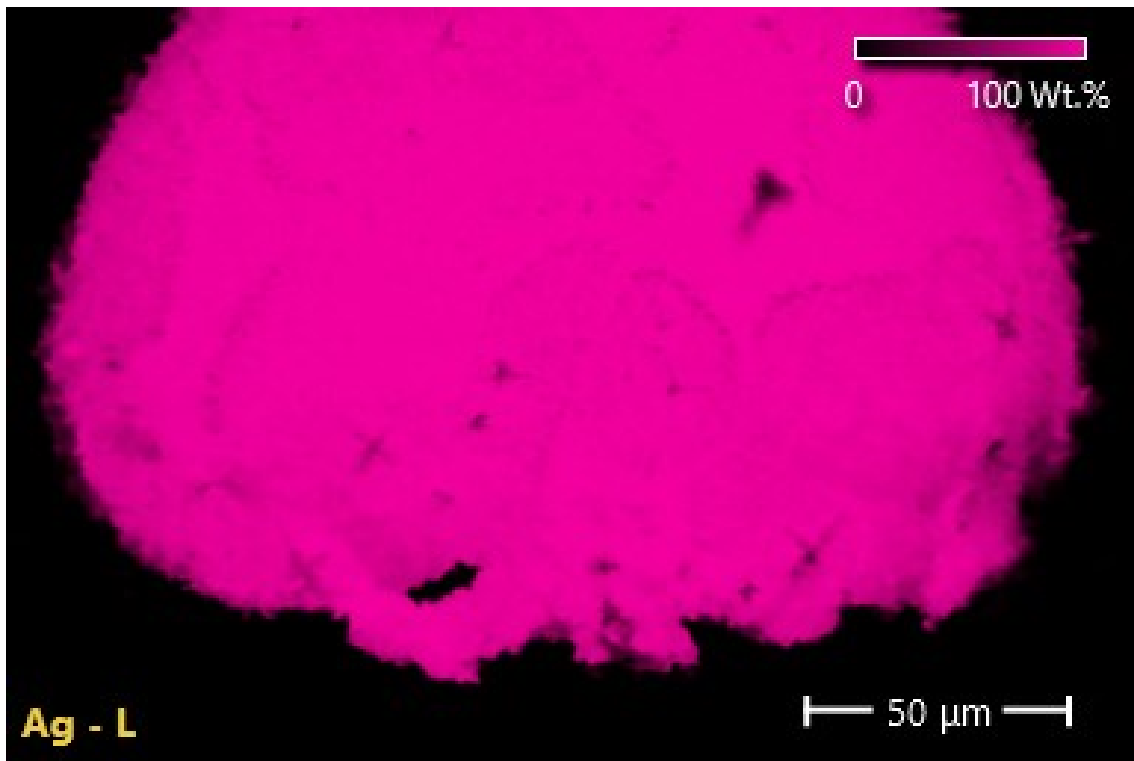

**Fig. S 10:** EDS analysis of the  $\text{Ag}_{86}\text{Ni}_{14}$  sample showing the spatial distribution of silver.

**Table S 1:** Sample weight before and after the KEMS analysis.

| Sample                            | Weight [mg] |            | Mass loss [%] |
|-----------------------------------|-------------|------------|---------------|
|                                   | Before KEMS | After KEMS |               |
| Ni                                | 5.0         | 4.6        | 8.0           |
| Ag <sub>9</sub> Ni <sub>91</sub>  | 4.0         | 3.5        | 12.5          |
| Ag <sub>29</sub> Ni <sub>71</sub> | 4.4         | 2.1        | 52.3          |
| Ag <sub>35</sub> Ni <sub>65</sub> | 4.1         | 3.1        | 24.4          |
| Ag <sub>45</sub> Ni <sub>55</sub> | 4.5         | 3.4        | 24.4          |
| Ag <sub>62</sub> Ni <sub>38</sub> | 4.9         | 3.5        | 28.6          |
| Ag <sub>73</sub> Ni <sub>27</sub> | 4.4         | 3.1        | 29.5          |
| Ag <sub>94</sub> Ni <sub>6</sub>  | 4.4         | 3.4        | 22.7          |
| Ag                                | 4.9         | 4.6        | 6.1           |

**Table S 2:** The results obtained by means of XPS analysis on sample Ag<sub>94</sub>Ni<sub>6</sub>.

| Sample                           | Name                         | Position (eV) | Raw Area | Area/(RSF*T*MFP) |
|----------------------------------|------------------------------|---------------|----------|------------------|
| Radiation shield<br>with deposit | Na 1s                        | 1071.57       | 2139.69  | 105.124          |
|                                  | C-C(H)                       | 284.8         | 8125.15  | 3821.44          |
|                                  | C-O                          | 286.18        | 726.827  | 341.999          |
|                                  | C=O                          | 288.2         | 495.243  | 233.182          |
|                                  | Si 2p                        | 102.11        | 234.26   | 139.731          |
|                                  | Al 2p                        | 73.97         | 1429.15  | 1311.4           |
|                                  | O 1s                         | 531.02        | 14407.2  | 238.628          |
|                                  | Ag 3d 5/2                    | 368.25        | 10922.4  | 283.272          |
|                                  | Ag 3d 3/2                    | 374.25        | 7338.2   | 190.139          |
|                                  | Original radiation<br>shield | Na 1s         | 1071.93  | 981.779          |
|                                  | C-C(H)                       | 284.8         | 5561.63  | 2615.76          |
|                                  | C-O                          | 286.3         | 322.801  | 151.9            |
|                                  | C=O                          | 288.42        | 343.39   | 161.694          |
|                                  | Si 2p                        | 101.98        | 521.436  | 311.036          |
|                                  | Al 2p                        | 73.71         | 3489.72  | 3202.46          |

**Table S 3:** Sample weight before and after the DSC analysis.

| Sample                            | Weight [mg] |           | Mass loss<br>[%] |
|-----------------------------------|-------------|-----------|------------------|
|                                   | Before DSC  | After DSC |                  |
| Ag <sub>9</sub> Ni <sub>91</sub>  | 24.6        | 20.0      | 18.7             |
| Ag <sub>51</sub> Ni <sub>49</sub> | 16.1        | 11.9      | 26.1             |
| Ag <sub>86</sub> Ni <sub>14</sub> | 14.3        | 13.1      | 8.4              |
